# Supplementary material for: The OTT-MAL fusion oncogene activates RBPJ-mediated transcription and induces acute megakaryoblastic leukemia in a knockin mouse model
Source: JCI journal article supplement (doi:10.1172/jci35901), 2009-03-16
Supplement: sd1 [file 1]

Figure S1

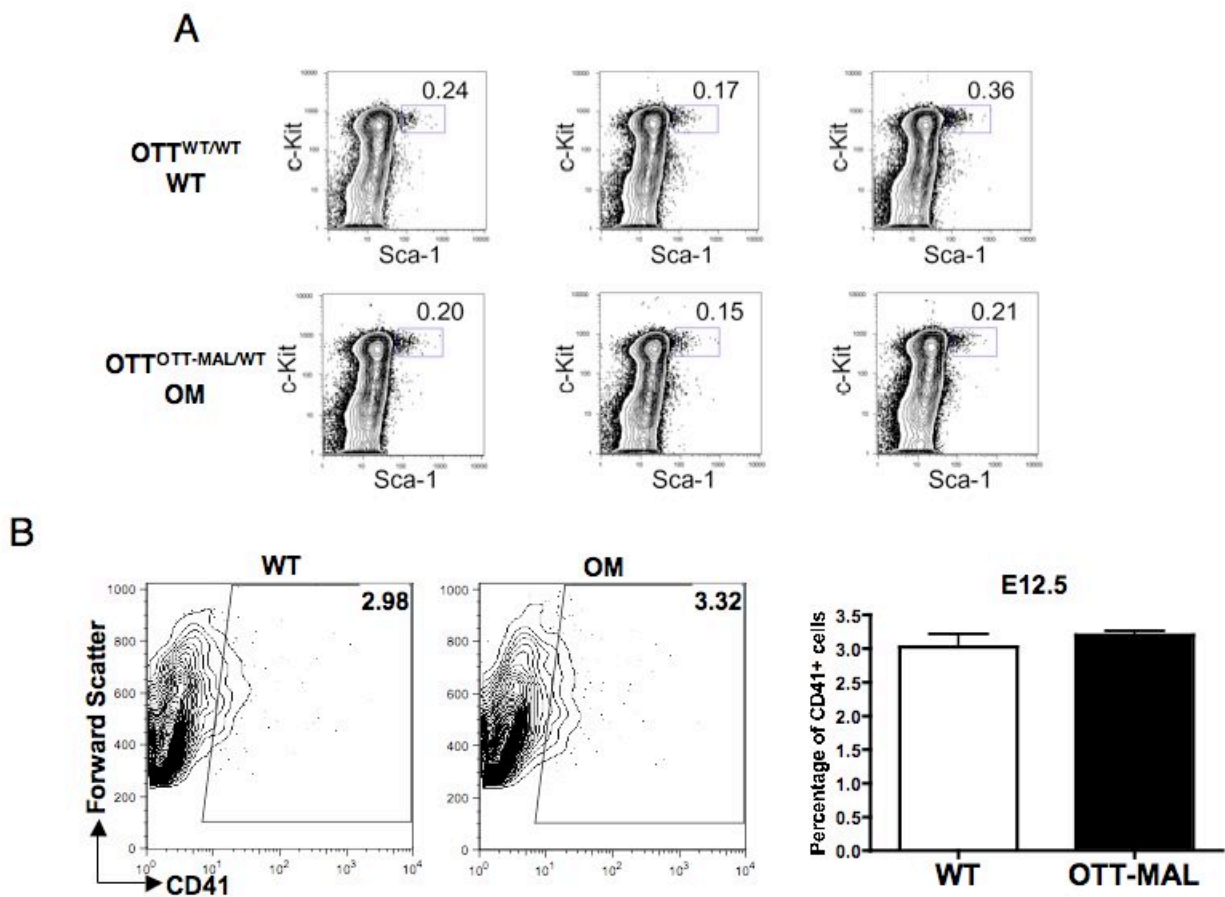

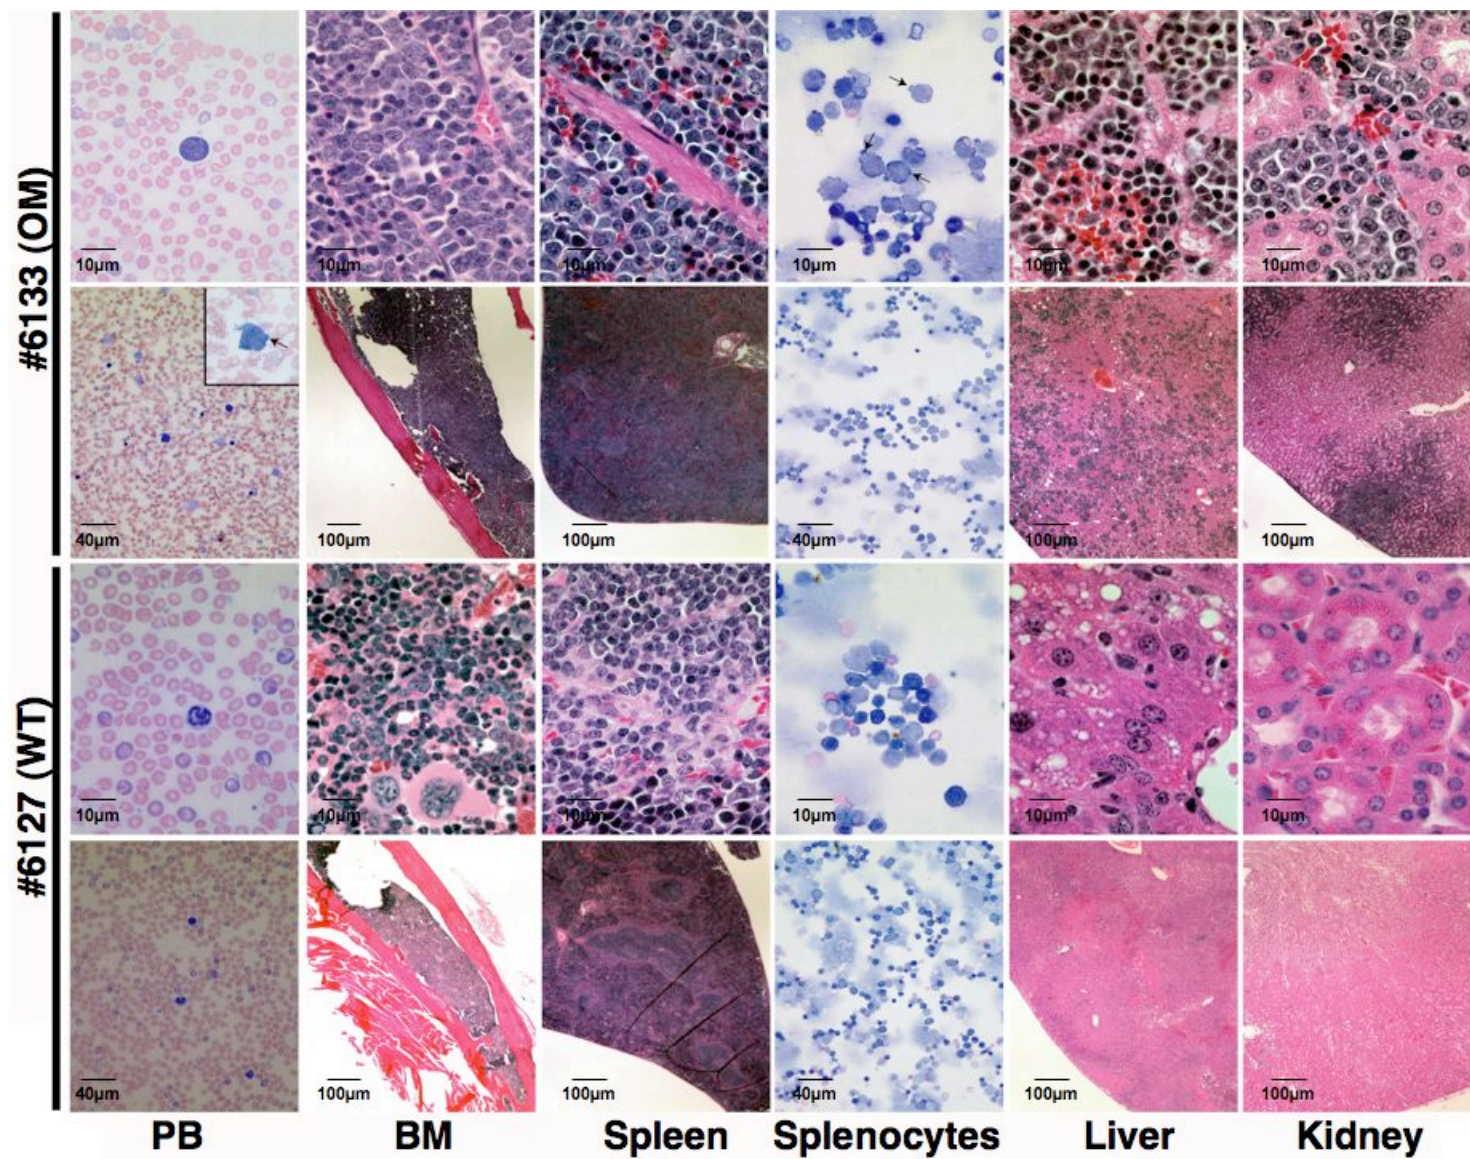

**Figure S2**

Mercher et al.



Figure S3

A

|                            | Spleen (mg)   | Liver (mg)       | WBC (K/ $\mu$ l) | HCT (%)    | Platelets (K/ $\mu$ l) |
|----------------------------|---------------|------------------|------------------|------------|------------------------|
| Secondary RBM15-MKL1 (n=8) | 232 (96-451)  | 1611 (694-2995)  | 35 (3.7-118)     | 46 (34-56) | 366 (222-527)          |
| Secondary WT (n=5)         | 43 (16-101)   | 858 (512-1207)   | 2 (1.5-3.22)     | 50 (36-58) | 397 (112-499)          |
| Tertiary RBM15-MKL1 (n=8)  | 780 (484-912) | 3491 (2501-4106) | 347 (149-539)    | 57 (52-64) | 1042 (770-1480)        |
| Tertiary WT (n=2)          | 44 (39-49)    | 1180 (1131-1229) | 2.54 (1.56-3.52) | 43 (41-45) | 804 (762-845)          |

B

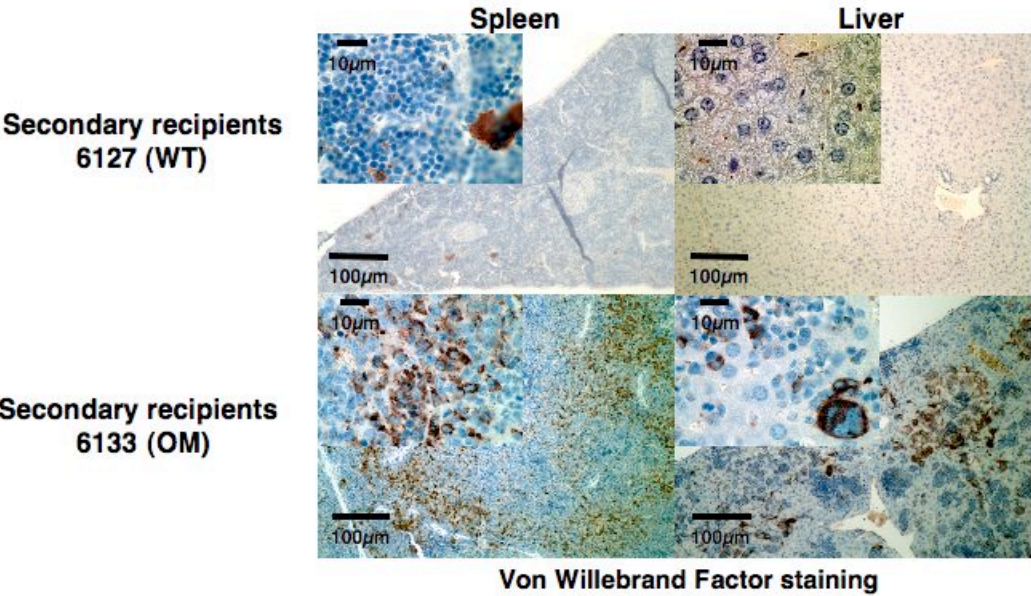

Figure S4

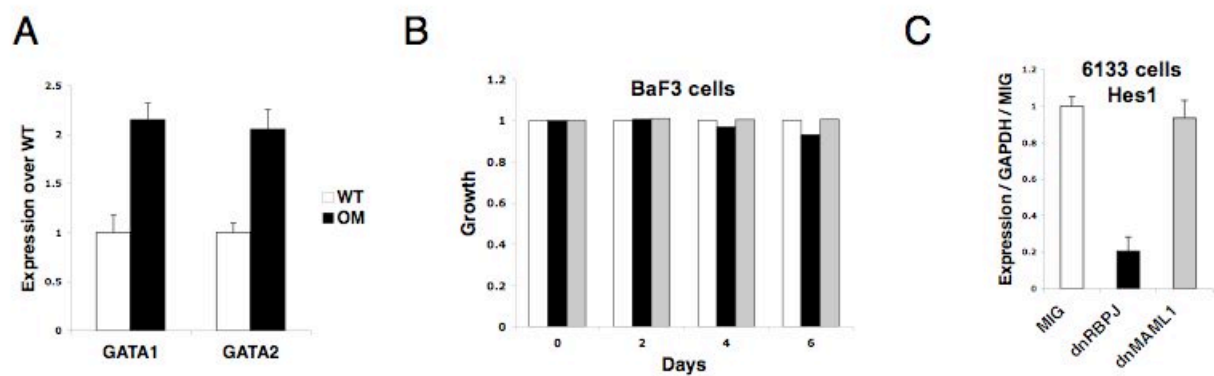

Figure S5

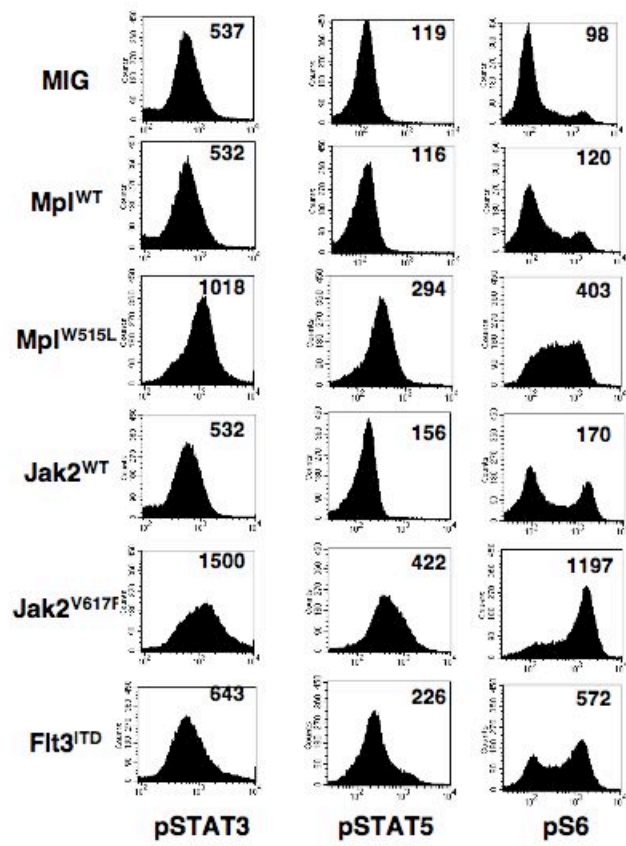

Figure S6

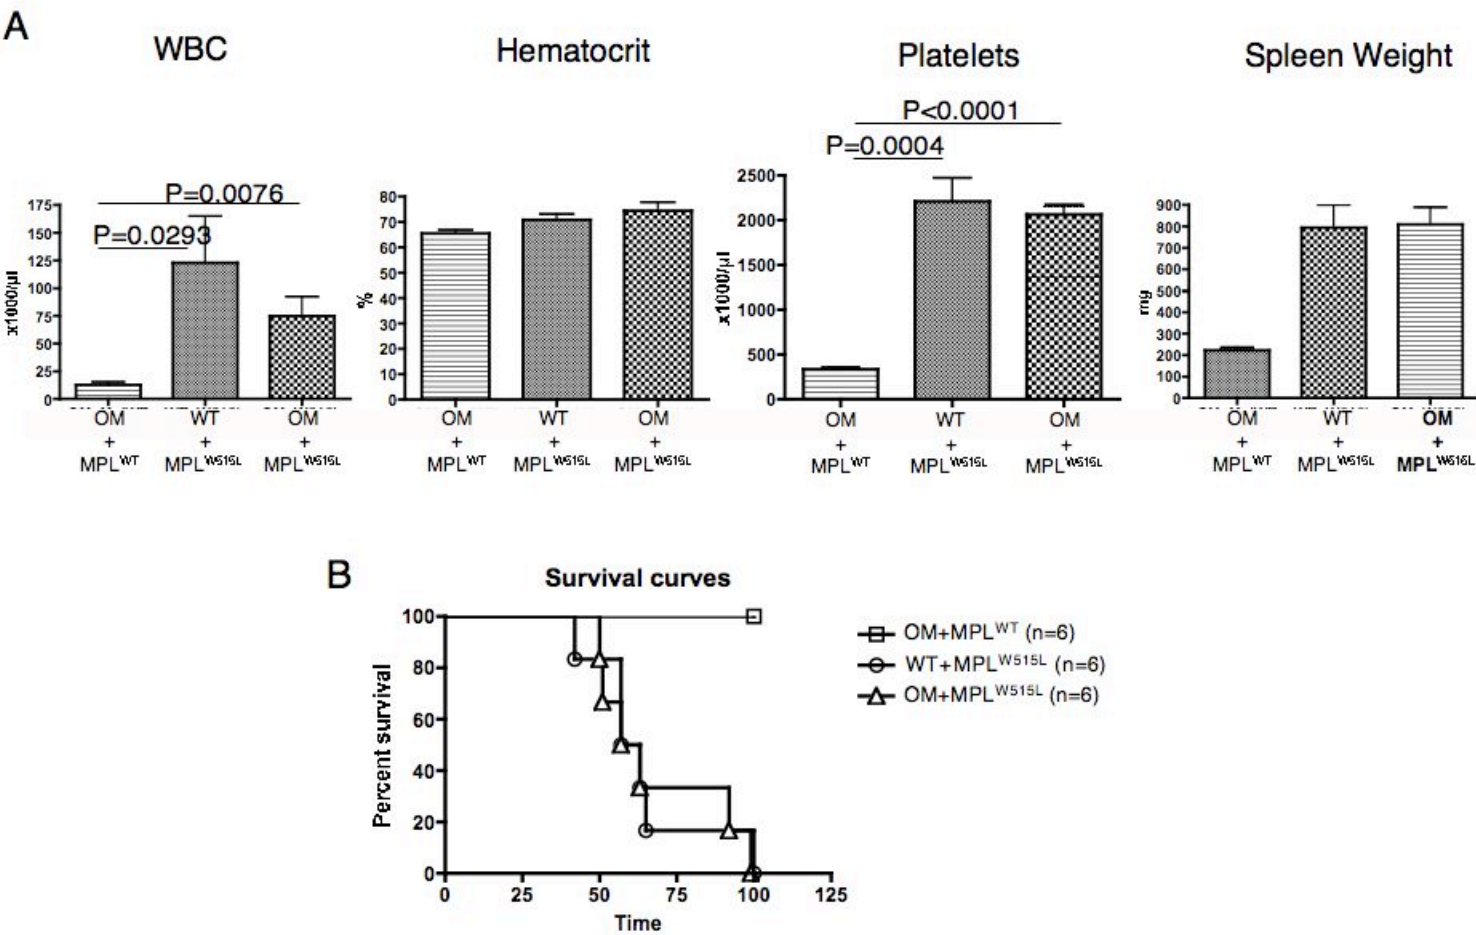

Figure S7

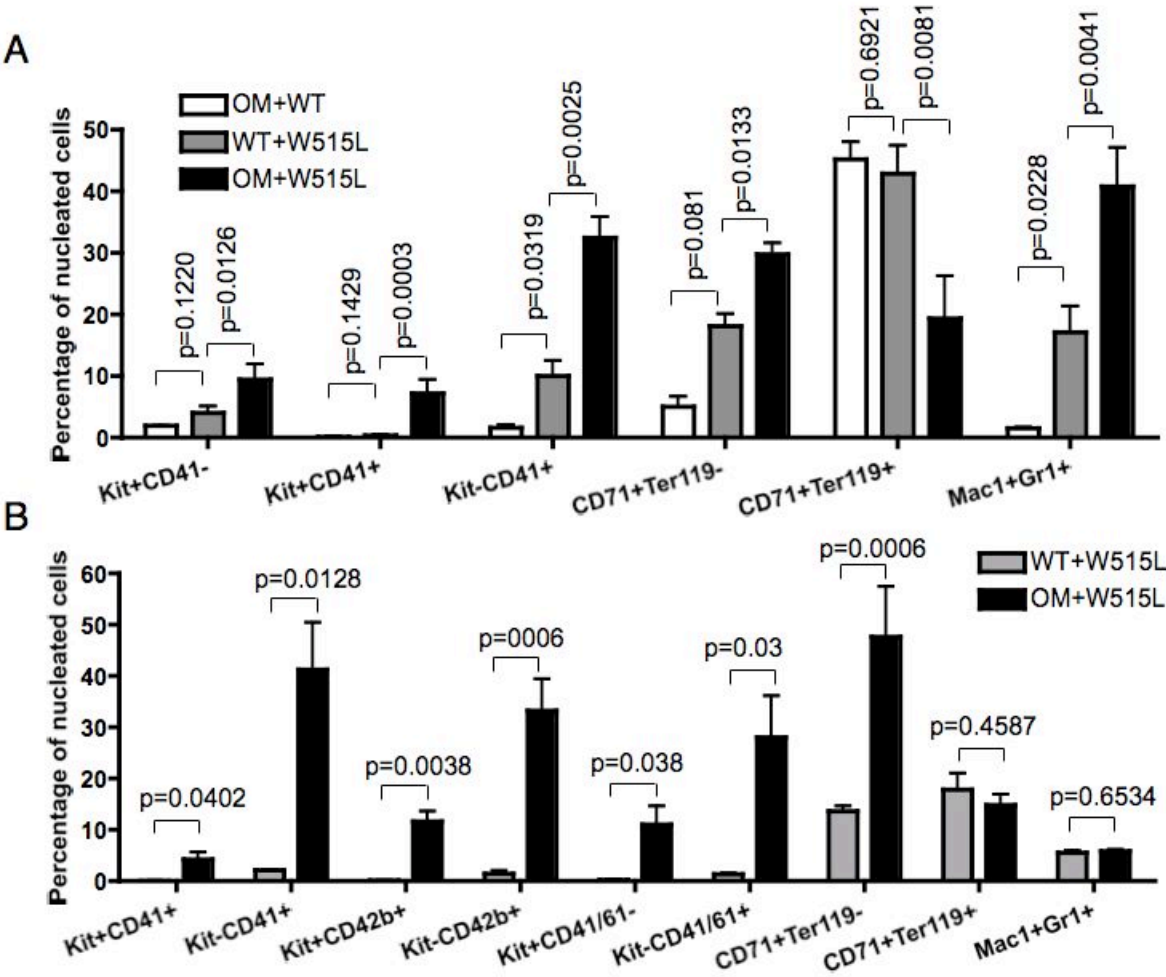

Figure S8

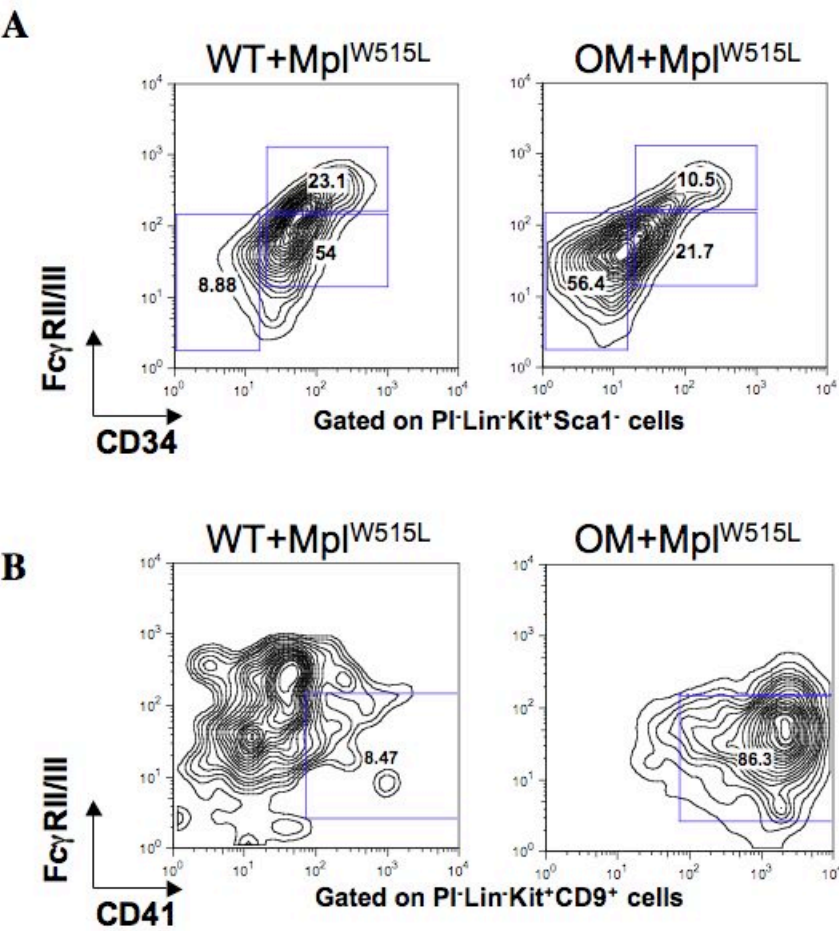



Figure S9

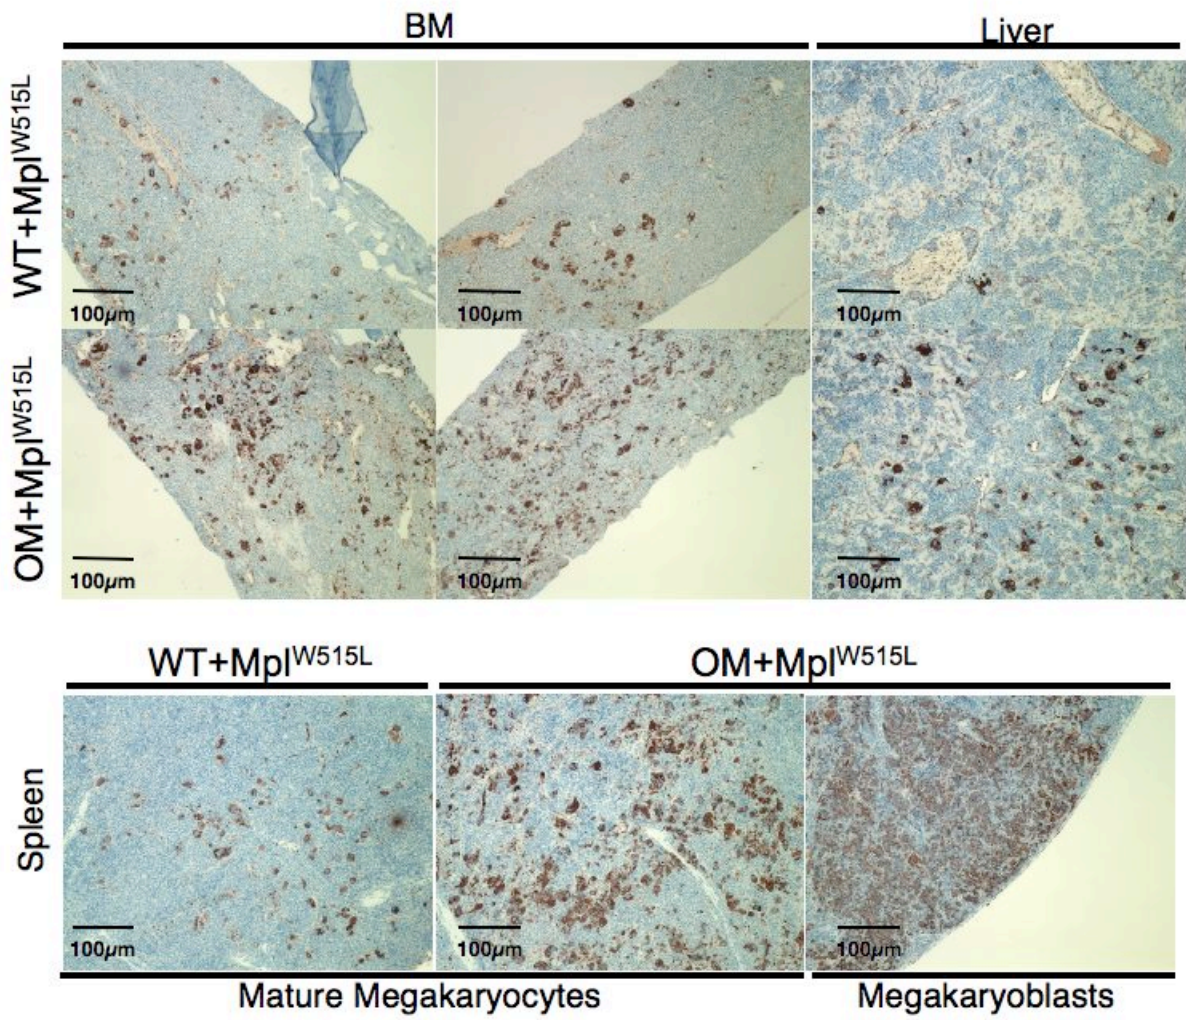

Figure S10

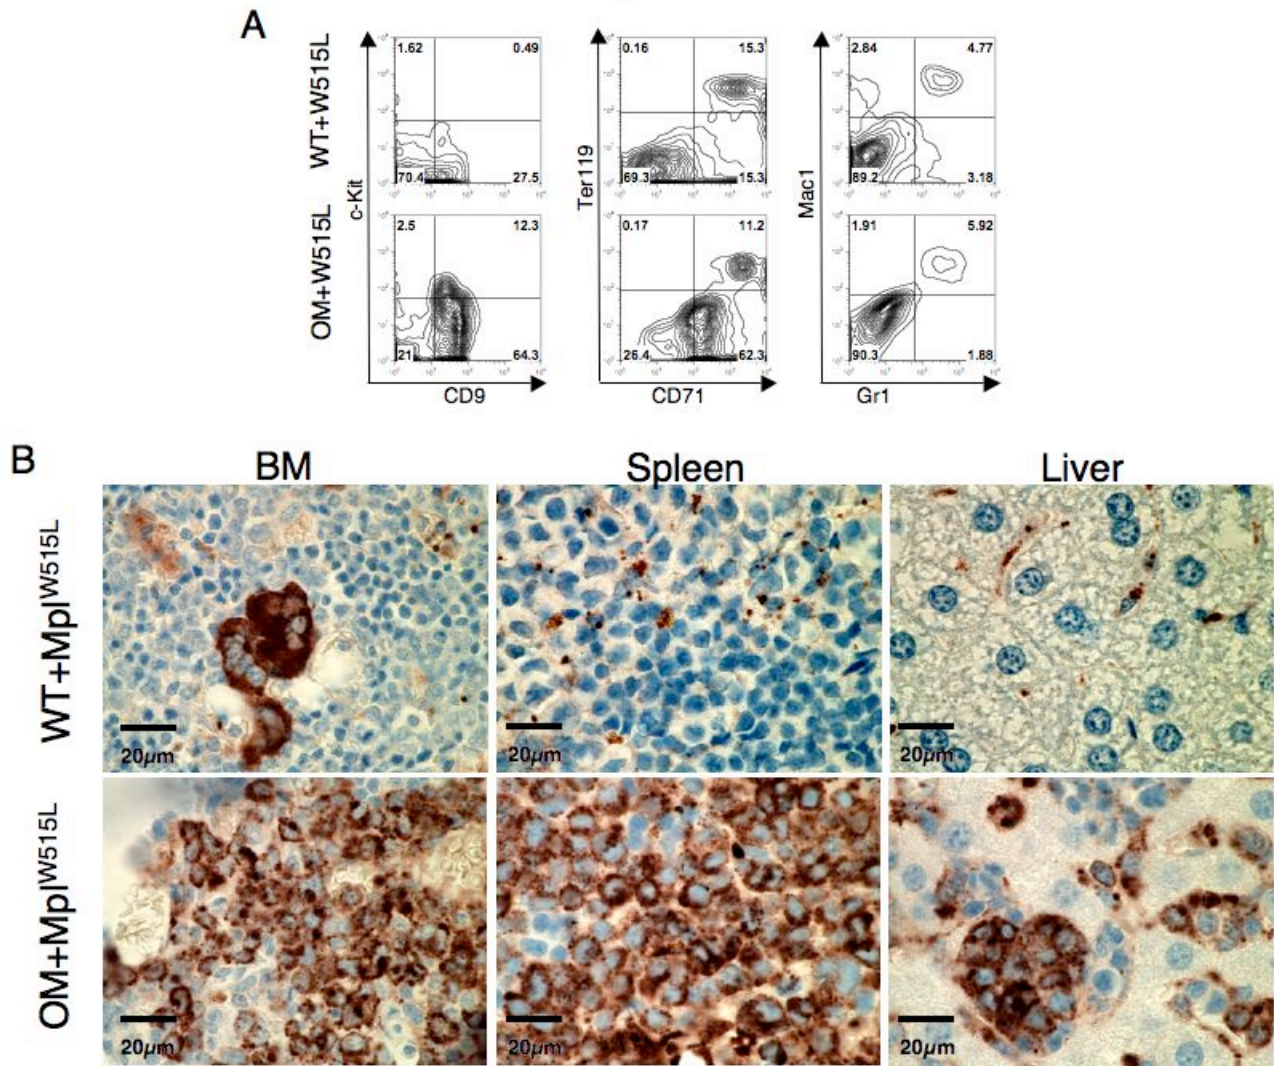



Figure S11

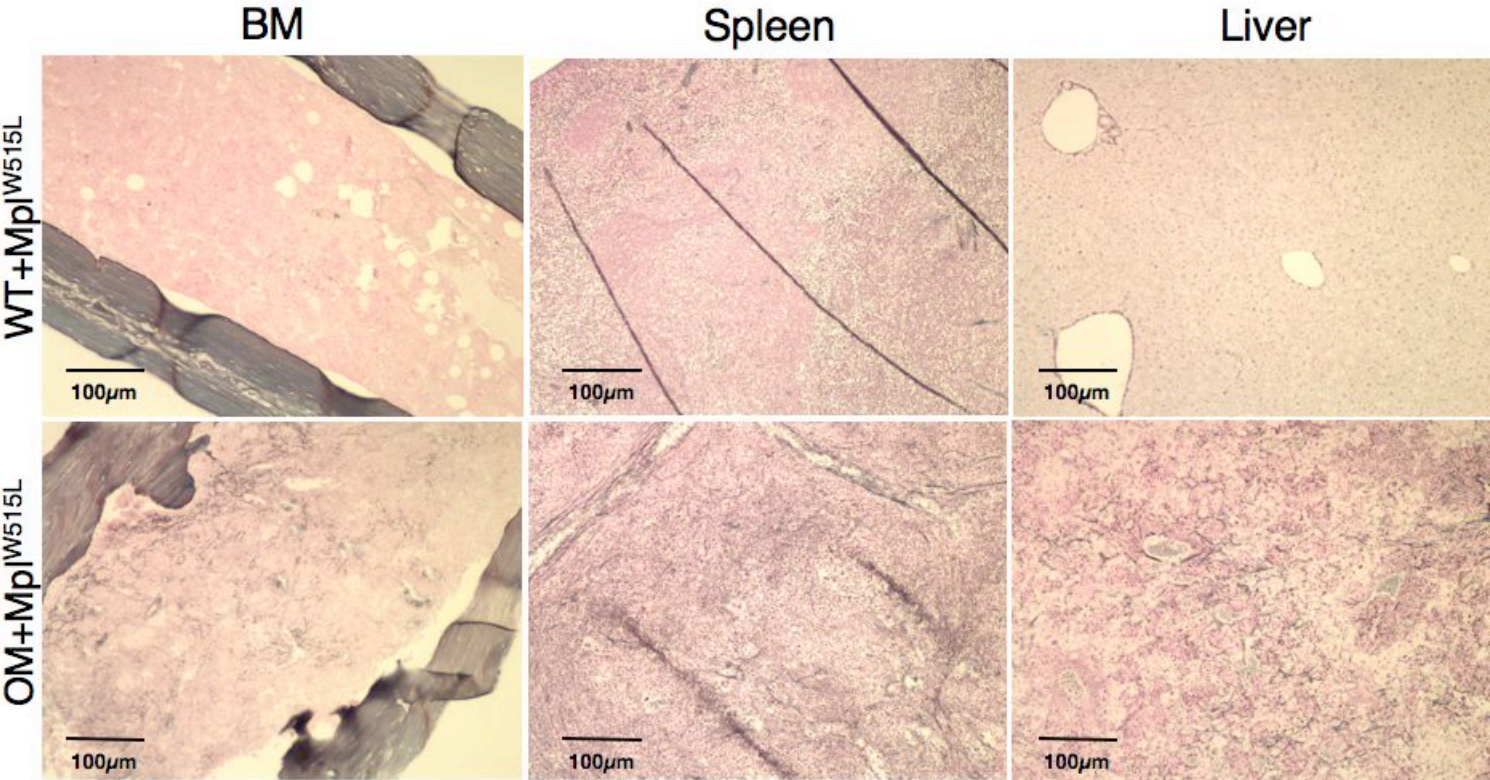

Figure S12

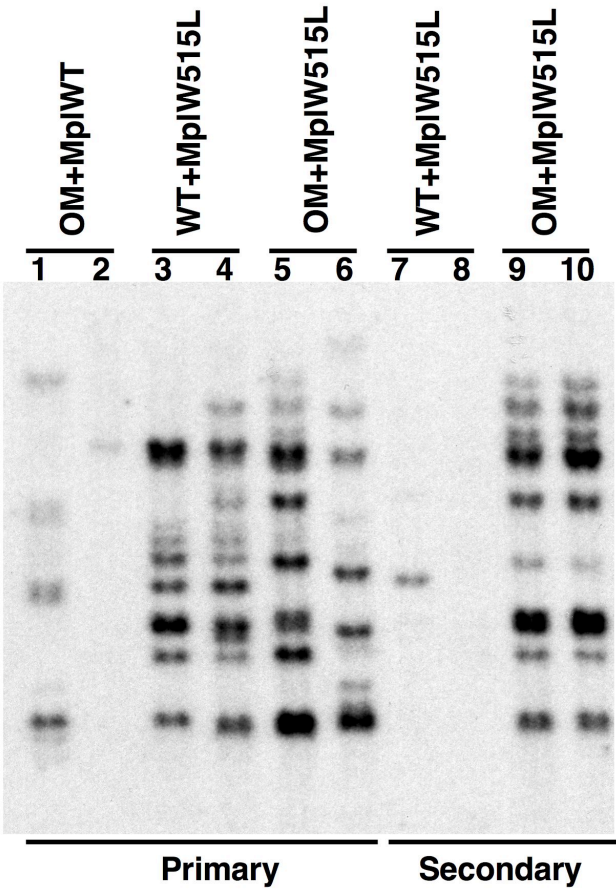



**Table S1:**  
**Notch pathway genes for Gene Set Enrichment Analysis**

| Probe Set ID | Gene   | Gene Title                                           |
|--------------|--------|------------------------------------------------------|
| 203395_s_at  | Hes1   | hairy and enhancer of split 1 (Drosophila)           |
| 203394_s_at  | Hes1   | hairy and enhancer of split 1 (Drosophila)           |
| 216674_at    | Hes2   | hairy and enhancer of split 2 (Drosophila)           |
| 214521_at    | Hes2   | hairy and enhancer of split 2 (Drosophila)           |
| 239230_at    | Hes5   | hairy and enhancer of split 5 (Drosophila)           |
| 204849_at    | Tcf15  | transcription factor-like 5 (basic helix-loop-helix) |
| 218839_at    | HEY1   | hairy/enhancer of split related with YRPW motif 1    |
| 44783_s_at   | HEY1   | hairy/enhancer of split related with YRPW motif 1    |
| 219743_at    | HEY2   | hairy/enhancer of split related with YRPW motif 2    |
| 201170_s_at  | BHLHB2 | basic helix-loop-helix domain containing, class B,2  |
| 201169_s_at  | BHLHB2 | basic helix-loop-helix domain containing, class B,2  |
| 221530_s_at  | BHLHB3 | basic helix-loop-helix domain containing, class B,3  |
| 202284_s_at  | CDKN1A | cyclin-dependent kinase inhibitor 1A (p21,Cip1)      |
| 218996_at    | TFPT   | TCF3 (E2A) fusion partner (in childhood leukemia)    |
| 211837_s_at  | PTCRA  | pre-TCRalpha (Ptcra)                                 |
| 215492_x_at  | PTCRA  | pre-TCRalpha (Ptcra)                                 |
| 211252_x_at  | PTCRA  | pre-TCRalpha (Ptcra)                                 |
| 209604_s_at  | GATA3  | GATA binding protein 3                               |
| 209602_s_at  | GATA3  | GATA binding protein 3                               |
| 209603_at    | GATA3  | GATA binding protein 3                               |
| 218751_s_at  | FBXW7  | F-box and WD-40 domain protein 7 (archipelago)       |
| 218902_at    | Notch1 | notch gene homolog 1 (Drosophila)                    |
| 212377_s_at  | Notch2 | notch gene homolog 2 (Drosophila)                    |
| 210756_s_at  | Notch2 | notch gene homolog 2 (Drosophila)                    |
| 202443_x_at  | Notch2 | notch gene homolog 2 (Drosophila)                    |
| 202445_s_at  | Notch2 | notch gene homolog 2 (Drosophila)                    |
| 203238_s_at  | Notch3 | notch gene homolog 3 (Drosophila)                    |
| 203237_s_at  | Notch3 | notch gene homolog 3 (Drosophila)                    |
| 205247_at    | Notch4 | notch gene homolog 4 (Drosophila)                    |
| 219537_x_at  | DLL3   | delta3 (Delta-like3/DLL3)                            |
| 209560_s_at  | DLK1   | delta-like1 homolog                                  |
| 216268_s_at  | JAG1   | jagged1 (Alagille syndrome)                          |
| 209097_s_at  | JAG1   | jagged1 (Alagille syndrome)                          |
| 209098_s_at  | JAG1   | jagged1 (Alagille syndrome)                          |
| 209099_x_at  | JAG1   | jagged1 (Alagille syndrome)                          |
| 32137_at     | JAG2   | jagged2                                              |
| 209784_s_at  | JAG2   | jagged2                                              |
| 32137_at     | JAG2   | jagged2                                              |
| 215732_s_at  | DTX2   | deltex2 homolog 2 (Drosophila)                       |
| 49051_g_at   | DTX3   | deltex3 homolog 3 (Drosophila)                       |
| 221835_at    | DTX3   | deltex3 homolog 3 (Drosophila)                       |
| 49049_at     | DTX3   | deltex3 homolog 3 (Drosophila)                       |
| 202604_x_at  | Adam10 | a disintegrin and metallopeptidase domain 10         |
| 214895_s_at  | Adam10 | a disintegrin and metallopeptidase domain 10         |
| 202603_at    | Adam10 | a disintegrin and metallopeptidase domain 10         |

|             |        |                                                    |
|-------------|--------|----------------------------------------------------|
| 213532_at   | Adam17 | a disintegrin and metallopeptidase domain 17       |
| 205746_s_at | Adam17 | a disintegrin and metallopeptidase domain 17       |
| 205745_x_at | Adam17 | a disintegrin and metallopeptidase domain 17       |
| 218389_s_at | Aph1a  | anterior pharynx defective 1a homolog (C. elegans) |
| 221036_s_at | Aph1b  | anterior pharynx defective 1b homolog (C. elegans) |
| 217094_s_at | Itch   | itchy homolog E3 ubiquitin protein ligase (mouse)  |
| 209743_s_at | Itch   | itchy homolog E3 ubiquitin protein ligase (mouse)  |
| 209744_x_at | Itch   | itchy homolog E3 ubiquitin protein ligase (mouse)  |
| 207782_s_at | Psen1  | presenilin 1 (Alzheimer disease 3)                 |
| 203460_s_at | Psen1  | presenilin 1 (Alzheimer disease 3)                 |
| 204262_s_at | Psen2  | presenilin 2 (Alzheimer disease 4)                 |
| 204261_s_at | Psen2  | presenilin 2 (Alzheimer disease 4)                 |
| 211373_s_at | Psen2  | presenilin 2 (Alzheimer disease 4)                 |
| 218302_at   | Psen2  | presenilin 2 (Alzheimer disease 4)                 |
| 202360_at   | Maml1  | mastermind like 1 (Drosophila)                     |
| 206480_at   | Maml1  | mastermind like 1 (Drosophila)                     |
| 207946_at   | MAML3  | mastermind like 3 (Drosophila)                     |
| 207785_s_at | RBPSUH | recombining binding protein suppressor of hairless |
| 211974_x_at | RBPSUH | recombining binding protein suppressor of hairless |
| 215270_at   | LFNG   | lunatic fringe homolog (Drosophila)                |
| 212968_at   | RFNG   | radical fringe homolog (Drosophila)                |
| 204153_s_at | MFNG   | manic fringe homolog (Drosophila)                  |
| 204152_s_at | MFNG   | manic fringe homolog (Drosophila)                  |
| 209073_s_at | Numb   | numb gene homolog (Drosophila)                     |
| 207545_s_at | Numb   | numb gene homolog (Drosophila)                     |
| 219286_s_at | Rbm15  | RNA binding motif protein 15                       |
| 202689_at   | Rbm15b | RNA binding motif protein 15B                      |
| 201996_s_at | SPEN   | spen homolog, transcriptional regulator (SHARP)    |
| 201997_s_at | SPEN   | spen homolog, transcriptional regulator (SHARP)    |
| 208759_at   | NCSTN  | nicastrin                                          |
| 204889_s_at | NEURL  | neuralized1 (Rfn67, Neurl1)                        |
| 204888_s_at | NEURL  | neuralized1 (Rfn67, Neurl1)                        |
| 205435_s_at | AAK1   | AP2-associated kinase                              |
| 214998_at   | AAK1   | AP2-associated kinase                              |
| 214956_at   | AAK1   | AP2-associated kinase                              |
| 211186_s_at | AAK1   | AP2-associated kinase                              |
| 205434_s_at | AAK1   | AP2-associated kinase                              |
| 209988_s_at | ASCL1  | Mash1/Hash1 (Ascl1)                                |
| 209985_s_at | ASCL1  | Mash1/Hash1 (Ascl1)                                |
| 213768_s_at | ASCL1  | Mash1/Hash1 (Ascl1)                                |
| 209987_s_at | ASCL1  | Mash1/Hash1 (Ascl1)                                |
| 201575_at   | SNW1   | SNW domain containing 1                            |
| 215424_s_at | SNW1   | SNW domain containing 1                            |
| 222183_x_at | SNW1   | SNW domain containing 1                            |
| 216424_at   | Cd4    | CD4 molecule                                       |
| 203547_at   | Cd4    | CD4 molecule                                       |

# **The OTT-MAL fusion oncogene activates RBPJ-mediated transcription and induces acute megakaryoblastic leukemia in a knock-in mouse model**

Thomas Mercher, Glen D. Raffel, Sandra A. Moore, Melanie G. Cornejo, Dominique Baudry-Bluteau, Nicolas Cagnard, Jonathan L. Jesneck, Yana Pikman, Dana Cullen, Ifor R. Williams, Koichi Akashi, Hirokazu Shigematsu, Jean-Pierre Bourquin, Marco Giovannini, William Vainchenker, Ross L. Levine, Benjamin H. Lee, Olivier A. Bernard, D. Gary Gilliland

## **Supplemental data legends**

**Figure S1:** Analysis of E12.5 fetal liver cells.

**A:** HSC (LSK cells) in WT vs. *OTT<sup>OTT-MAL</sup>* (OM)

**B:** E12.5 total fetal liver cells analyzed by flow cytometry for the CD41 marker.

**Figure S2:** Histopathologic analysis of OTT-MAL-induced AMKL.

Peripheral blood (PB) smears and cytopun splenocytes (Splenocytes) were stained with Wright-Giemsa solutions. Bone marrow (BM), spleen, liver and kidney sections from #6127 (WT control) and #6133 (OM) animals were stained with Hematoxylin&Eosin (H&E) solutions. Arrows indicate megakaryoblasts with cytoplasmic blebs, characteristic of human AMKL, in peripheral blood and splenocytes of #6133.

**Figure S3:** AMKL developed in *OTT<sup>OTT-MAL</sup>* (OM) animal is transplantable to secondary recipients.

**A:** Average (lowest value, highest value) spleen weight, liver weight, white blood counts (WBC), hematocrit percentage (HCT) and platelet counts in secondary SCID recipients are indicated.

**B:** Von Willebrand factor immunohistochemistry on spleen and liver sections from secondary recipients is shown.

**Figure S4:** dnRBPJ inhibits proliferation of 6133 cells but not Ba/F3 cells.

**A:** RNA was extracted from lineage-negative cells of OM and WT littermate control animals and analyzed by quantitative RT-PCR for Notch target genes compared to Gapdh.

**B:** Ba/F3 cells were infected with dnRBPJ, dnMAML1 and empty vector, sorted for GFP+ cell after 24 hours and viable cells were counted. Mean number of cells is shown.

**C:** RNA were extracted from 6133 cells infected with dnRBPJ, dnMAML1 and empty vector, and analyzed for expression of Hes1 transcript by quantitative RT-PCR compared to Gapdh. Mean $\pm$ SD of triplicate experiments is shown.

**Figure S5:** Phospho-flow cytometry analysis of 6133 cells.

Phosphoflow cytometry analysis of STAT3, STAT5 and S6 phosphorylation status in 6133 cells transduced with different mutants. Median fluorescence intensity is indicated on the histograms.

**Figure S6:** Characteristic of primary animals transplanted with *OTT*<sup>OTT-MAL</sup> +*MPL*<sup>W515L</sup> (OM+*MPL*<sup>W515L</sup>) and control bone marrow cells.



**A:** Counts from WT+*MPL*<sup>W515L</sup> and OM+*MPL*<sup>W515L</sup> primary recipients. White blood cell, hematocrit, platelet counts and spleen weights of animals transplanted with WT+*MPL*<sup>W515L</sup> or OM+*MPL*<sup>W515L</sup> cells are shown.

**B:** Kaplan-Meier survival curves of primary recipients.

**Figure S7:** Histogram representation of flow cytometry results in primary (**A**) and secondary (**B**) transplant animals. Mean+/-SD of three independent animals are shown.

**Figure S8:** MEP and MKP expansion in the spleens of OM+*MPL*<sup>W515L</sup> animals.

**A:** Multi-parameter flow analysis of bone marrow CMP, GMP and MEP populations. Experiment was performed in duplicate and a representative analysis gated on PI<sup>-</sup>Lin<sup>-</sup>Sca<sup>-</sup>Kit<sup>+</sup> cells is shown.

**B:** Multi-parameter flow analysis of the MKP population. MKP are defined as Lin<sup>-</sup>Kit<sup>+</sup>CD9<sup>+</sup>FcγRII/III<sup>Low</sup>CD41<sup>+</sup>. Percentage of gated population is indicated.

**Figure S9:** Increased number of infiltrating megakaryocytes in primary OM+*MPL*<sup>W515L</sup> animals compared to WT+*MPL*<sup>W515L</sup>. Von Willebrand factor immunohistochemistry was performed on bone marrow, spleen and liver sections. Megakaryoblasts indicates areas showing poorly differentiated immature hypolobated megakaryocytes almost exclusively.

**Figure S10:** Secondary recipients have a AMKL phenotype.

**A:** Flow cytometry analysis of secondary recipient splenocytes.

**B:** Von Willebrand staining of secondary OM+*MPL*<sup>W515L</sup> tissue sections reveals infiltration of bone marrow, spleen and liver with poorly differentiated immature megakaryoblasts.

**Figure S11:** AMKL is associated with increased fibrosis.

Bone marrow, spleen and liver sections were stained for reticulin fibers (black).

**Figure S12:** Clonality analysis.

DNA from primary (Lane #1-6) and secondary (Lane #7-10) recipients were extracted from bone marrow cells, digested with BamHI and analyzed by Southern blot using a probe in the GFP coding region. Numerous insertions of the MSCV *MPL*<sup>W515L</sup> iresGFP are visible in primary and secondary (>10 insertion sites) *OTT*<sup>OTT-MAL</sup>+*MPL*<sup>W515L</sup> recipients (Lanes #5-6 and lanes #9-10, respectively). Secondary recipients (Lanes #9-10) presented here were derived from the primary animal in lane #5. Of note, the variation in the relative intensity between the bands, comparing either the primary animal (Lane #5) with secondary animals (Lanes #9-10) or the two secondary animals, supports the presence of several independent leukemic clones in primary and secondary recipients.

**Table S1:** Notch signaling pathway genes for gene set enrichment analysis.

Genes were included in the list based on the report in the literature of their

implication in the Notch signaling pathway. Probe set identification numbers; gene symbols and gene names are shown.
